# Supplementary material for: Ocean acidification alters morphology of all otolith types in Clark’s anemonefish (Amphiprion clarkii)
Source: PubMed Central journal article supplement (PMC6327886; doi:10.7717/peerj.6152), 2019-01-07

**CHARACTERISTIC #1 - CRYSTAL HABIT**

Crystal habit has to do with shape of a crystal. You should focus on the whole otolith though most of the crystal structure will be in the “core” of the otolith. Below are the habits and pictures of the “ideal” shape.

Orthorhombic

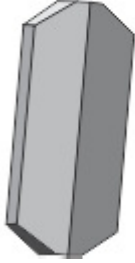

Hexagonal

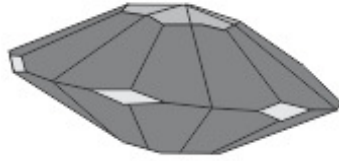

Acicular

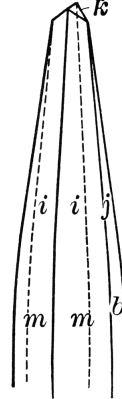

acrystalline

No  
obvious  
crystals

Amorphous

Small  
“blubs” of  
material

To Score the images, identify the DOMINANT habit:

1 = orthorhombic

2 = acicular

3 = hexagonal

4 = acrystalline (no crystals)

5 = amorphous

## **CHARACTERISTIC #2 – MINEROLOGY**

Here we will use crystal habit to identify relative percentages of minerals using the following key:

Aragonite

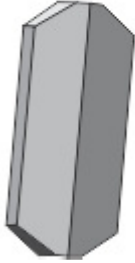

Vaterite

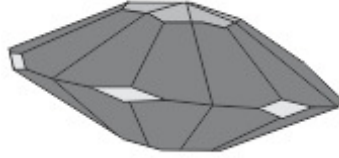

Score images as follows:

1 = completely aragonite

2 = vaterite  $\leq 33\%$

3 = vaterite 33% to 66%

4 =  $\geq 66\%$  vaterite.

5 = no visible crystals

**CHARACTERISTIC #3 - % VISIBLE MINERALS**

Using your best estimate, what is the relative % of visible crystals? Enter into Box.

**ESTIMATING PERCENTAGES**

Below are images with the relative % of dark material noted. When you look at these figures examine the balance of white space to dark space use the balance to estimate % dark.

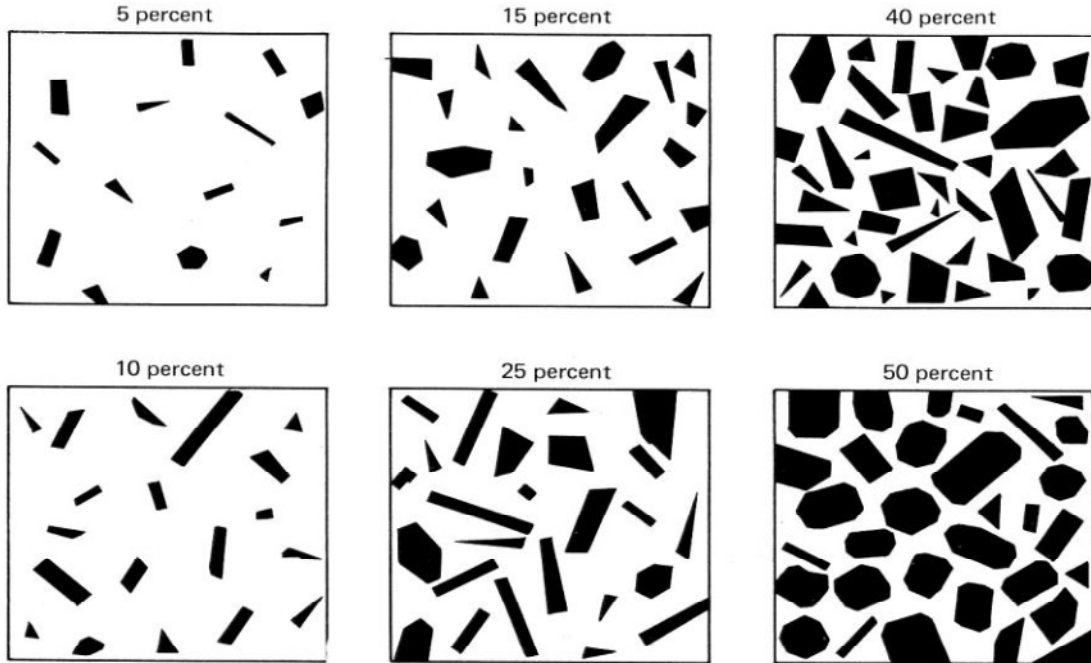

Using the above figure as an example you will be asked to evaluate the % of a particular characteristic in images of fish ear stones (otoliths).

**CHARACTERISTIC #4 - CORE DEVELOPMENT**

Rank core crystal development using the scheme shown below (1-5)

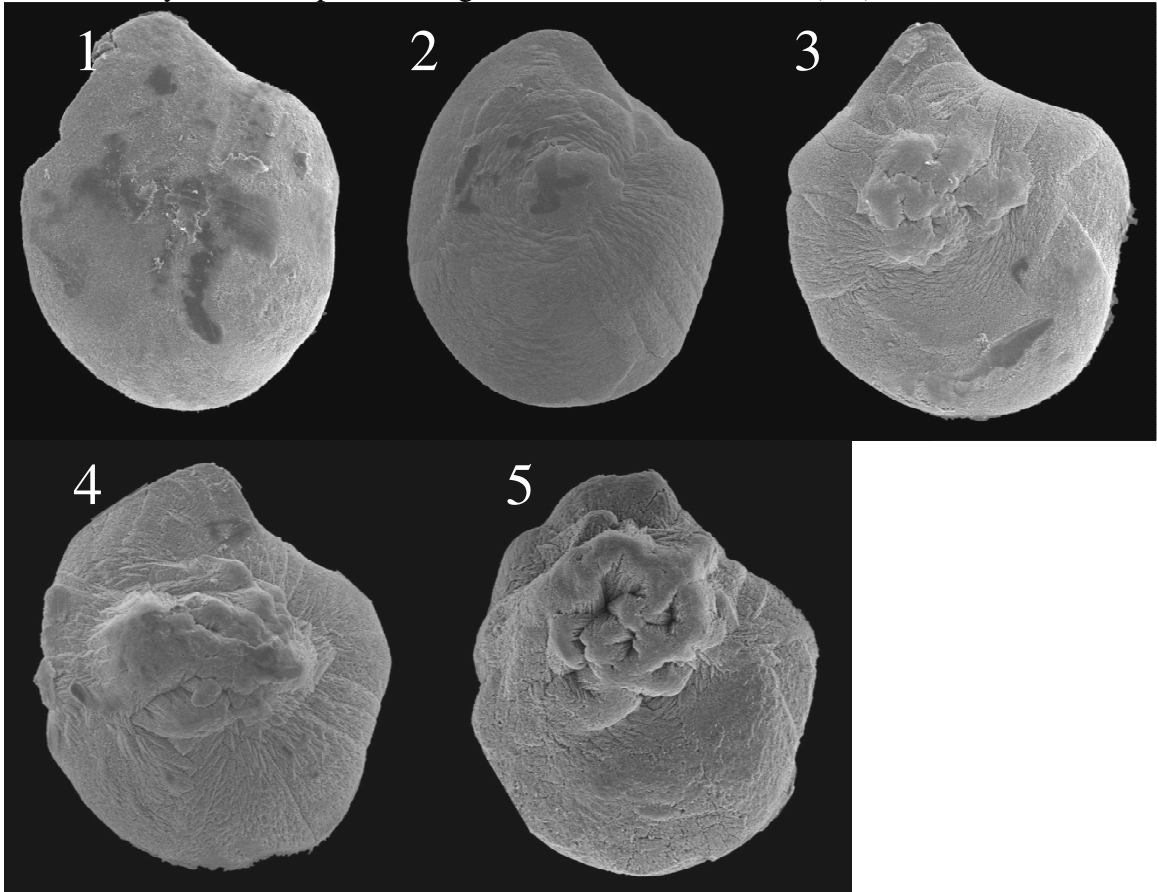

Supplement: peerj-07-6152-s004.pdf [file peerj-07-6152-s004.pdf]
